# Supplementary material for: Neutrophil-like cell membrane-coated siRNA of lncRNA AABR07017145.1 therapy for cardiac hypertrophy via inhibiting ferroptosis of CMECs
Source: PubMed Central journal article supplement — Mol Ther Nucleic Acids. 2021 Nov 3;27:16–36. doi: 10.1016/j.omtn.2021.10.024 (PMC8646082; doi:10.1016/j.omtn.2021.10.024), 2021-11-03
Supplement: mmc1.pdf [file mmc1.pdf]

OMTN, Volume 27

## Supplemental information

### **Neutrophil-like cell membrane-coated siRNA of lncRNA *AABR07017145.1* therapy for cardiac hypertrophy via inhibiting ferroptosis of CMECs**

**Pilong Shi, Minghui Li, Chao Song, Hanping Qi, Lina Ba, Yonggang Cao, Meitian Zhang, Yawen Xie, Jing Ren, Jiabi Wu, Ping Ren, and Hongli Sun**

Supplementary figure.1

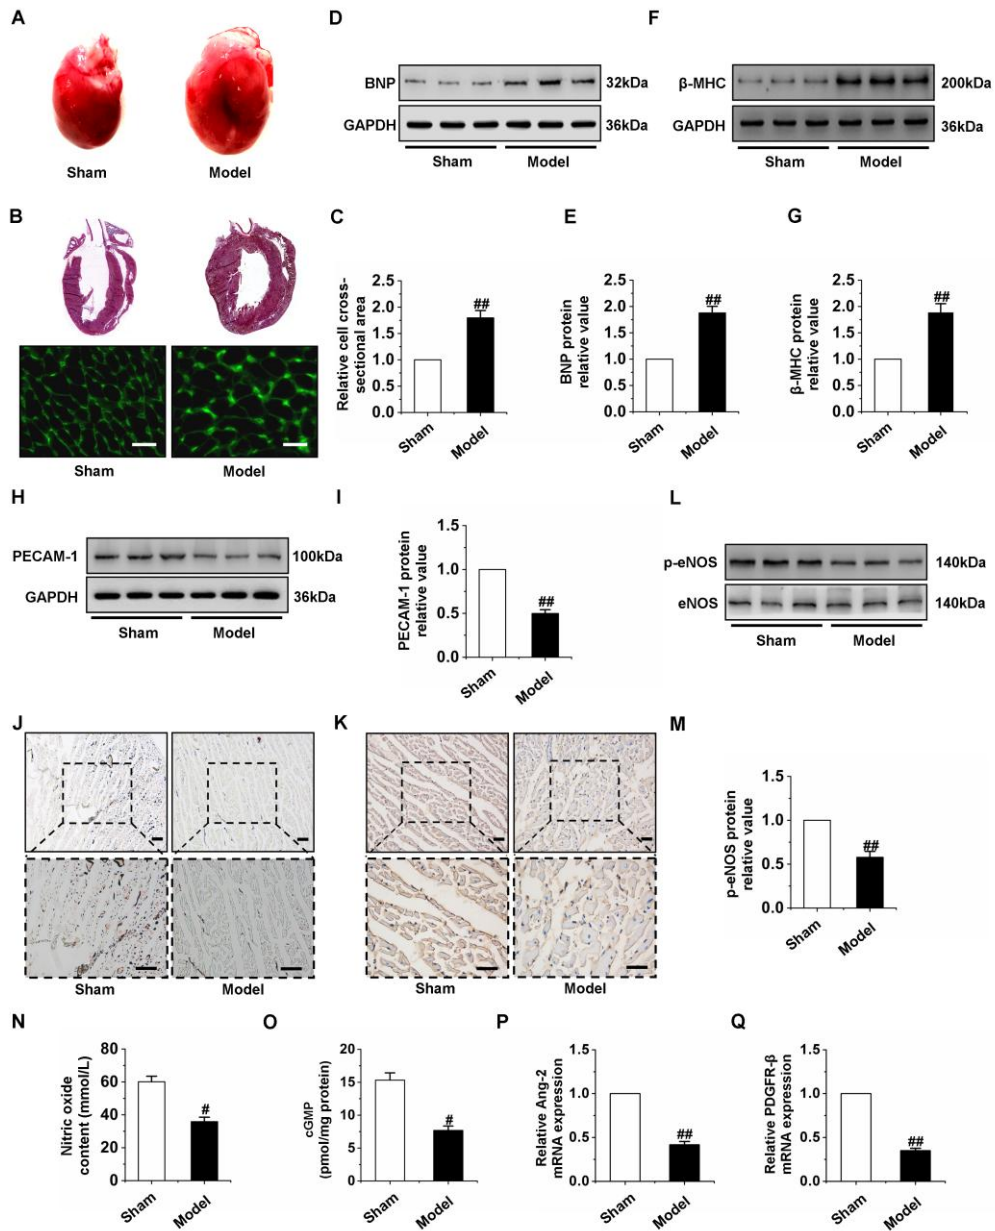

### Supplementary figure S1. Cardiac microvascular damage is induced in hypertrophic hearts

(A) Cardiac volume representative images of rats induced by AAC for 4 weeks. (B-C) Representative sections of heart stained for HE and WGA staining in rats induced by AAC for 4 weeks. (D-E) Detection of *BNP* protein expression by western blot analysis in cardiac tissue. (F-G) Western blot analysis of  $\beta$ -*MHC* expression in cardiac tissue. (H-I) Detection of *PECAM-1* protein expression by western blot analysis in

cardiac tissue. (J) The effect of treatment with AAC for 4 weeks on microvascular perfusion. (K) Representative image of immunohistochemistry of *PECAM-1* in the AAC-induced rat hearts. (L-M) Western blot results of *p-eNOS* protein in cardiac tissue. (N) Statistical analysis of NO content in cardiac tissue of rats. (O) Statistical analysis of cGMP content in cardiac tissue of rats. (P-Q) Quantification of the mRNA expressions of *Ang-2* and *PDGFR-β* was validated by qRT-PCR in cardiac tissue. NO: nitric oxide. AAC: abdominal aorta constriction. WGA: wheat germ agglutinin. Model group: Rats were treated with AAC for 4 weeks. Data were represented by means  $\pm$  SEM (n=6). <sup>#</sup>*P*<0.05 and <sup>##</sup>*P*<0.01 vs. sham group. Scale bars, Figure S1B, 50  $\mu$ m; Figure S1J, 100  $\mu$ m ( $\times$ 100); 100  $\mu$ m ( $\times$ 200); Figure S1K, 50  $\mu$ m ( $\times$ 200); 50  $\mu$ m ( $\times$ 400).

Supplementary figure.2

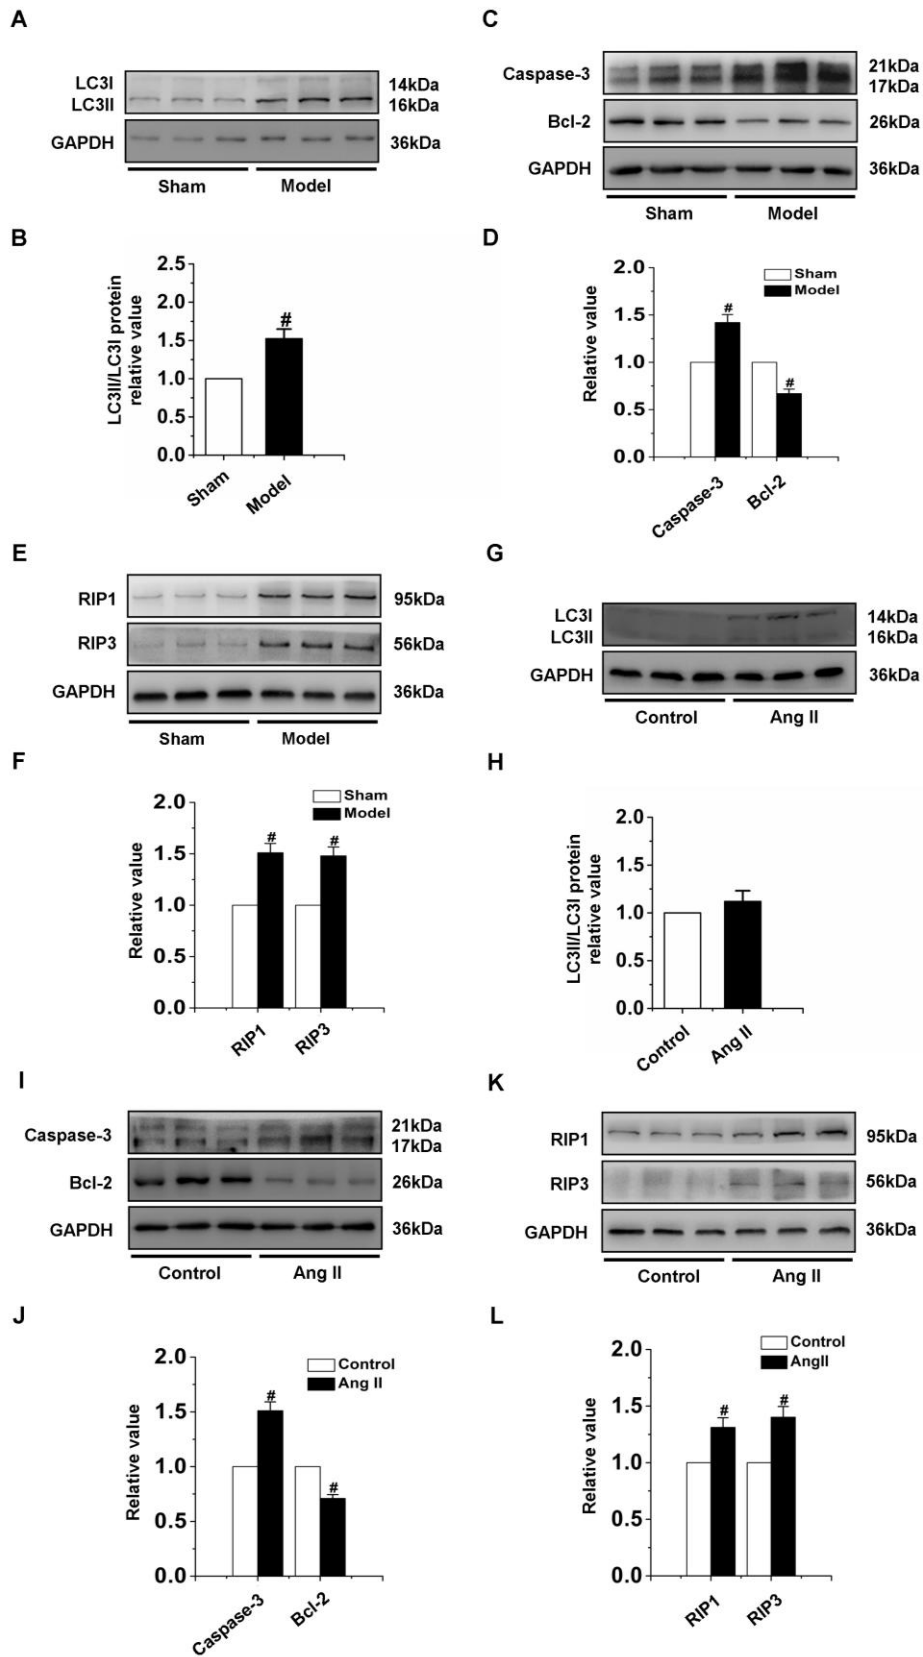

Supplementary figure S2. Autophagy, apoptosis and necroptosis occur in

**myocardial hypertrophy rat hearts, while apoptosis and necroptosis in CMECs**

(A-B) Western blots were performed to analyze the *LC3II* expression in cardiac tissue isolated from rats exposed to AAC for 4 weeks. (C-D) Western blot results of *caspase-3* and *Bcl-2* protein expression in cardiac tissue. (E-F) Western blot results of *RIP1* and *RIP3* protein expression levels in cardiac tissue isolated from rats. Model group: Rats were treated with AAC for 4 weeks. Data were represented by means  $\pm$  SEM (n=6). <sup>#</sup>*P*<0.05 vs. sham group. (G-H) Western blot results of *LC3II* protein expression in CMECs induced by Ang II for 24 h. (I-J) Western blot analysis of *caspase-3* and *Bcl-2* protein expression in CMECs. (K-L) Protein levels of *RIP1* and *RIP3* in CMECs. Ang II group: CMECs were exposed to Ang II for 24 h. Data were represented by means  $\pm$  SEM (n=6). <sup>#</sup>*P*<0.05 vs. control group.

Supplementary figure.3

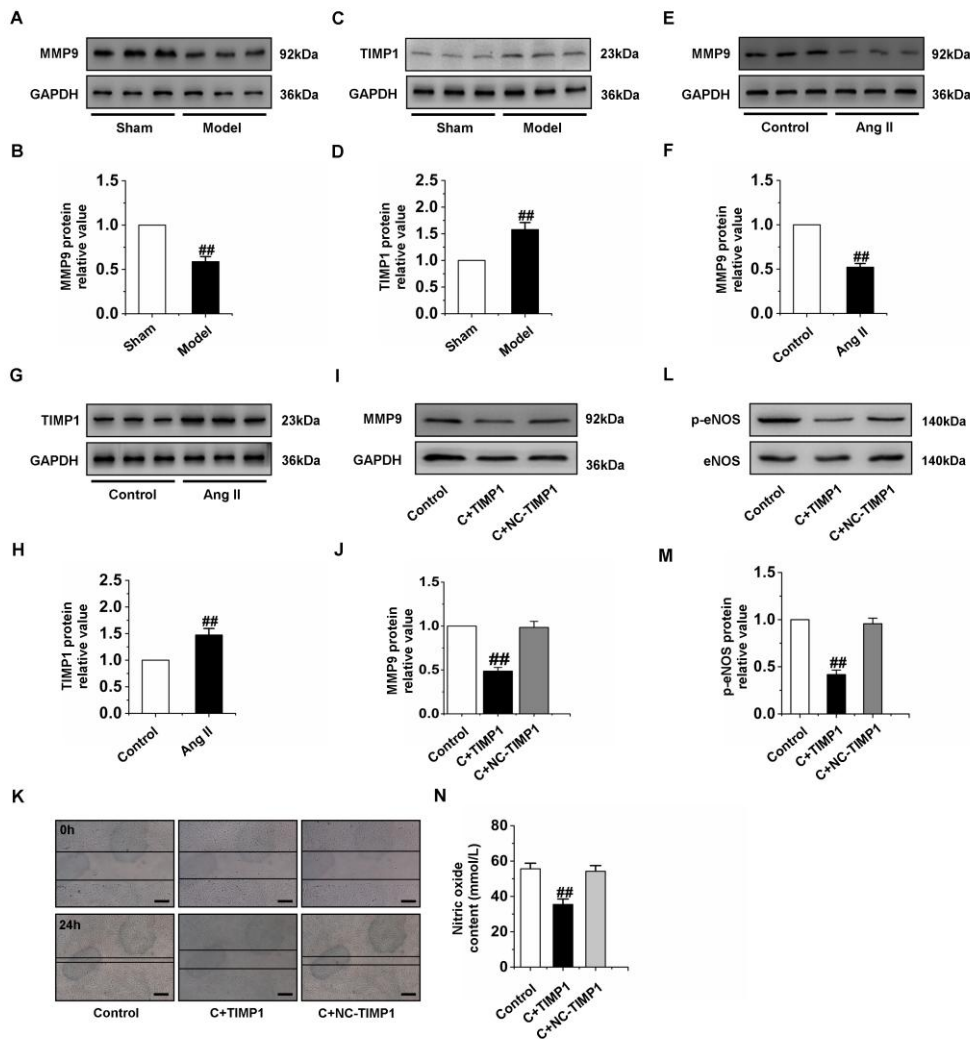

### Supplementary figure S3. Overexpression of *TIMP1* leads to dysfunction of CMECs

(A-D) Detection of *MMP9* and *TIMP1* protein expression of cardiac tissue after AAC treatment for 4 weeks by western blot analysis. Data were represented by means  $\pm$  SEM (n=6).  $^{###}P<0.01$  vs. sham group. (E-H) Detection of *MMP9* and *TIMP1* protein expression in CMECs treated with 100 nM Ang II for 24 h. (I-J) The protein expression of *MMP9* in CMECs were detected by western blot after *TIMP1* or control vectors (NC-*TIMP1*) and x-treme GENE were added to the CMECs and incubated at 37 °C for 24 h. (K) The scratch test was used to detect the effect of overexpression of *TIMP1* on migration ability of CMECs. (L-M) Western blot analysis of *p-eNOS* in CMECs. (N) Statistical analysis chart of NO content in CMECs. C+*TIMP1*: *TIMP1*

and x-treme GENE were added to the CMECs and incubated at 37 °C for 24 h. C+NC-*TIMP1*: pcDNA3.1 empty vector was transfected into CMECs for 24 h. Data were represented by means  $\pm$  SEM (n=6). <sup>##</sup>*P*<0.01 vs. control group. Scale bars: 10  $\mu$ m.

Supplementary figure.4

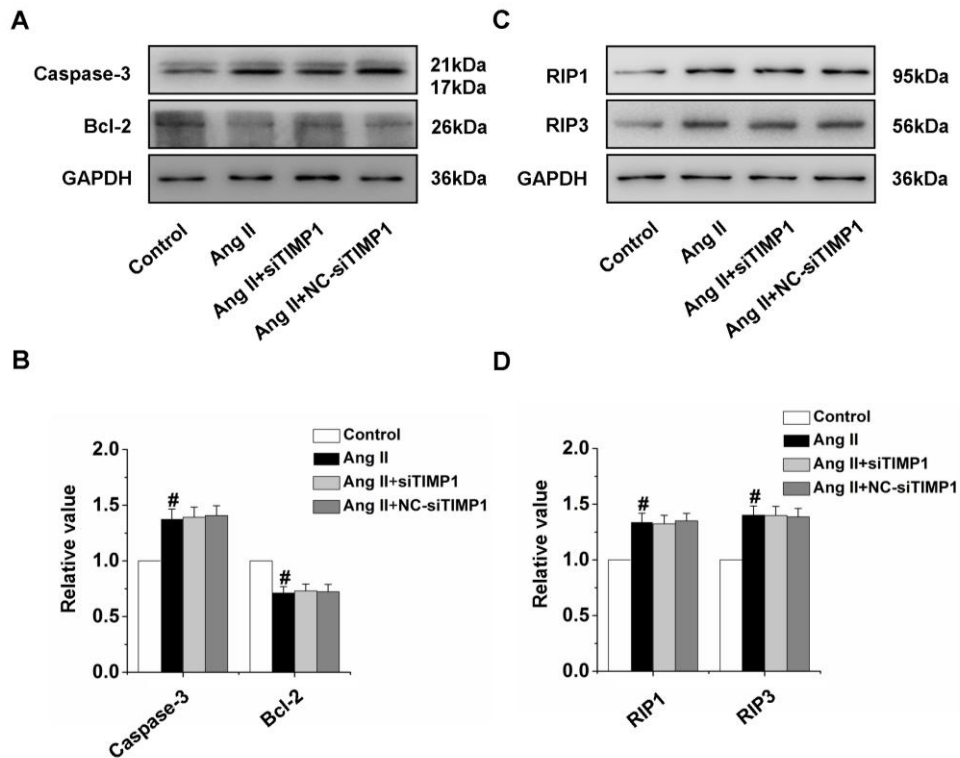

**Supplementary figure S4. Silencing *TIMP1* does not inhibit cell apoptosis and necroptosis**

(A-B) Western blot results of *caspase-3* and *Bcl-2* protein expression in CMECs treated with *siTIMP1* for 24 h and then exposed to Ang II for 24 h. (C-D) Western blot results of *RIP1* and *RIP3* protein expression levels in CMECs. *siTIMP1*: *TIMP1* was silenced. Ang II+*siTIMP1*: CMECs were treated with *siTIMP1* for 24 h and then exposed to Ang II for 24 h. Ang II+NC-*siTIMP1*: CMECs were treated with negative control of *siTIMP1* for 24 h and then exposed to Ang II for 24 h. Data were represented by means  $\pm$  SEM (n=6). #*P*<0.05 vs. control group.



## Supplementary figure.5

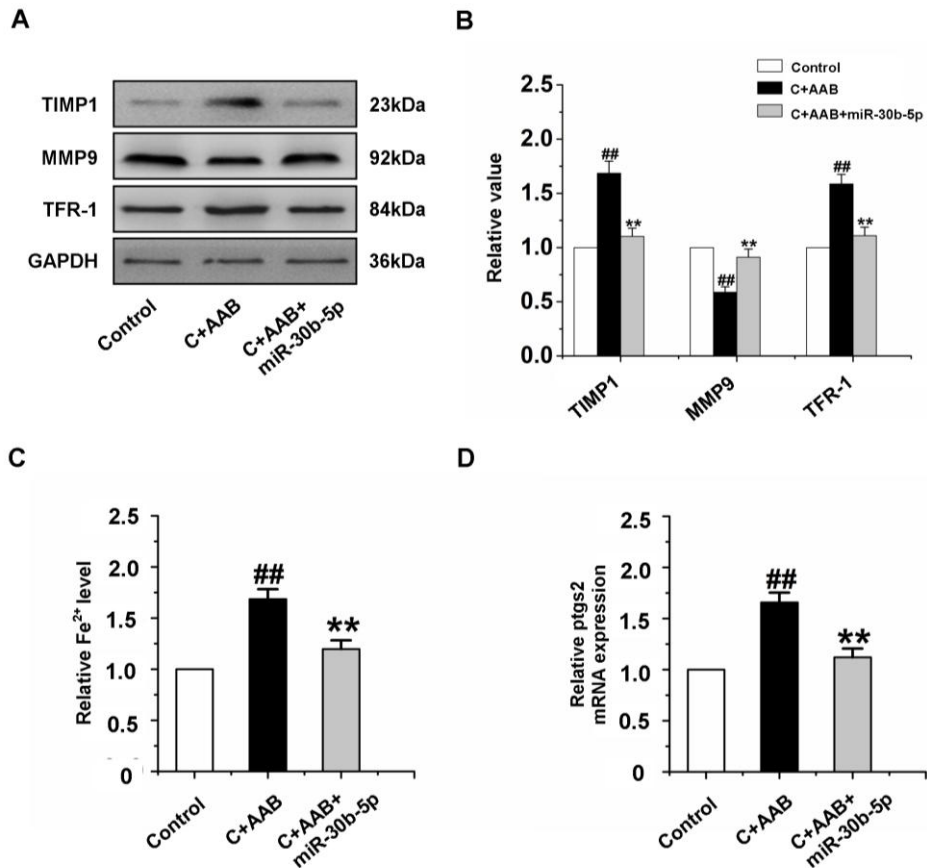

### Supplementary figure S5. LncRNA *AAB* regulates ferroptosis via *miR-30b-5p* in CMEC

(A-B) Western blot analysis of *TIMP1*, *MMP9* and *TFR-1* in CMECs co-transfected with lncRNA *AAB* and *miR-30b-5p* for 24 h. (C) Statistical analysis chart of Fe<sup>2+</sup> content in CMECs. (D) qRT-PCR was used to detect the *pts2* mRNA expression in CMECs. *AAB*: lncRNA *AAB*. C+AAB: CMECs were transfected with lncRNA *AAB* for 24 h. C+AAB+*miR-30b-5p*: CMECs were co-transfected with lncRNA *AAB* and *miR-30b-5p* for 24 h. Data were represented by means  $\pm$  SEM (n=6). ##*P*<0.01 vs. control group. \*\**P*<0.01 vs. C+AAB group.

## Supplementary figure.6

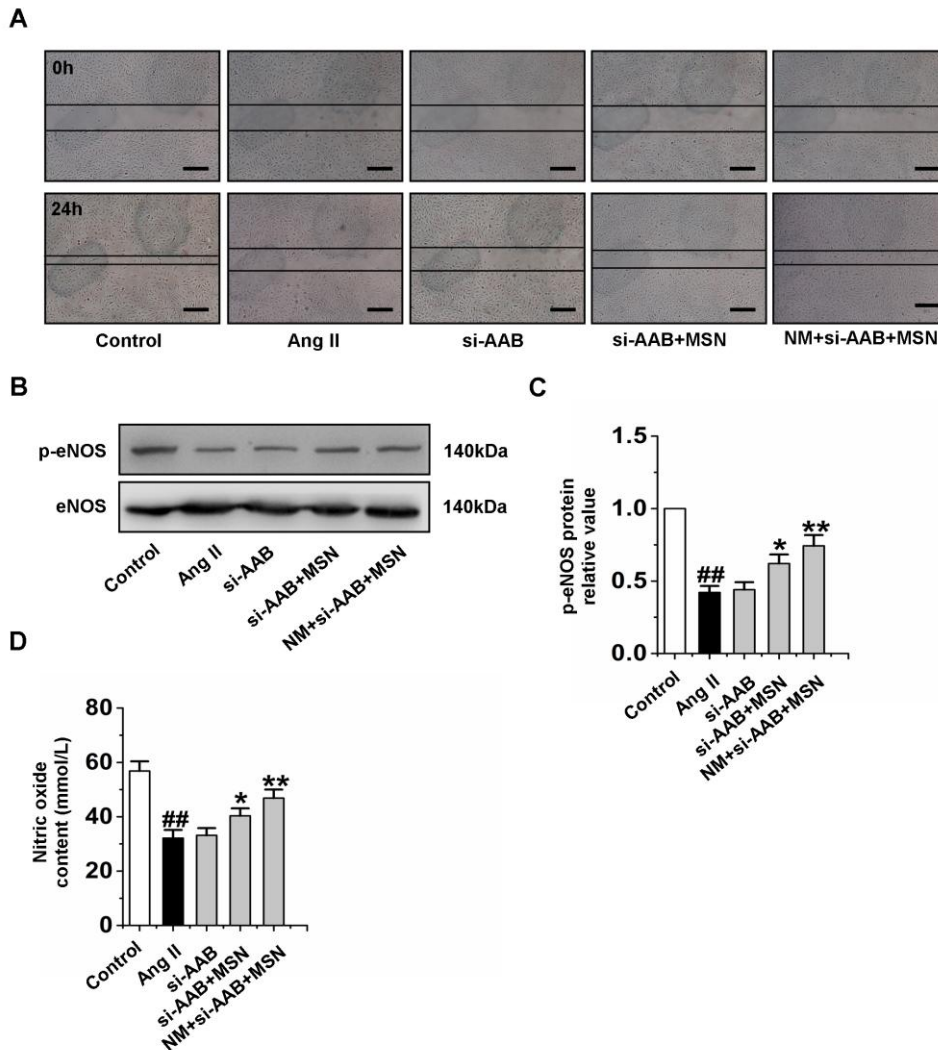

### Supplementary figure S6. NM+si-AAB+MSN improves the function of CMECs induced by Ang II

(A) The scratch test was used to detect the effect of si-AAB, si-AAB+MSN and NM+si-AAB+MSN on migration ability of CMECs exposed to Ang II for 24 h. (B-C) Western blot analysis of *p-eNOS*. (D) Statistical analysis chart of NO content. Ang II group: The CMECs were given 100 nM Ang II for 24 h. si-AAB, si-AAB+MSN and NM+si-AAB+MSN groups: The CMECs were given 100 nM Ang II for 24 h following by treatment with si-AAB, si-AAB+MSN and NM+si-AAB+MSN for 48 h, respectively. Data were represented by means  $\pm$  SEM (n=6). <sup>##</sup> $P < 0.01$  vs. control group; <sup>\*</sup> $P < 0.05$  and <sup>\*\*</sup> $P < 0.01$  vs. Ang II group. Scale bars: 10  $\mu$ m.

Supplementary figure.7

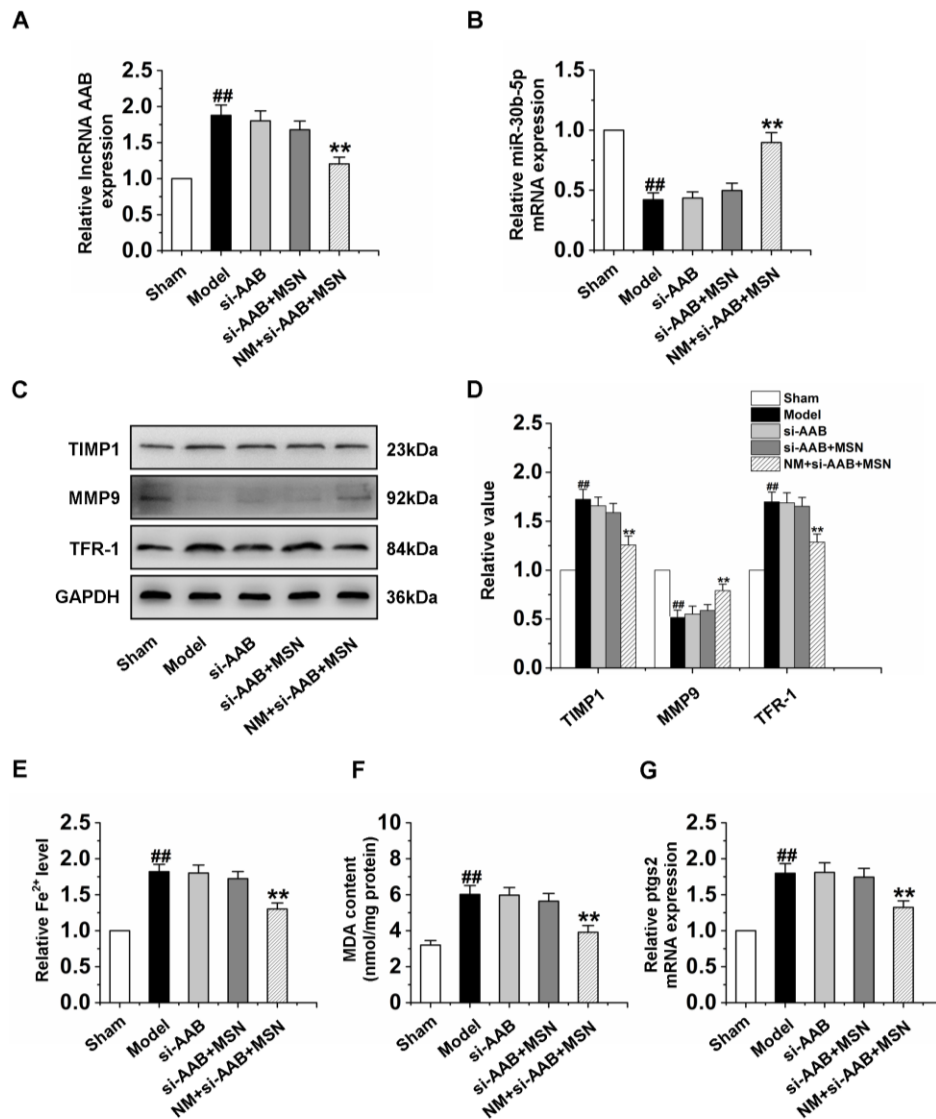

Supplementary figure S7. NM+si-AAB+MSN inhibits the ferroptosis of hypertrophic heart

(A) qRT-PCR analysis of IncRNA *AAB* in the hearts of cardiac hypertrophy rats induced by AAC for 4 weeks. (B) The *miR-30b-5p* mRNA level was detected by qRT-PCR in different groups. (C-D) Western blot analysis of *TIMP1*, *MMP9* and *TFR-1* in cardiac tissue of rats. (E) Statistical analysis chart of iron ions content in hearts of rats. (F) Statistical analysis chart of MDA content in cardiac tissue. (G) mRNA expression of *ptgs2* in cardiac tissue was measured by qRT-PCR. Model group: Rats were subjected to AAC and received vehicle (PBS, caudal vein injection) 24 h later once every 2 days for 4 weeks. si-AAB group: Rats were subjected to AAC and

treated with si-*AAB* via tail vein injection 24 h later every 2 days for 4 weeks. si-*AAB*+MSN group: Rats were subjected to AAC and treated with si-*AAB*+MSN via tail vein injection 24 h later every 2 days for 4 weeks. NM+si-*AAB*+MSN group: Rats were subjected to AAC and treated with NM+si-*AAB*+MSN via tail vein injection 24 h later every 2 days for 4 weeks. Data were represented by means  $\pm$  SEM (n=6).  
## $P$ <0.01 vs. sham group; \*\* $P$ <0.01 vs. model group.

## Supplementary figure.8

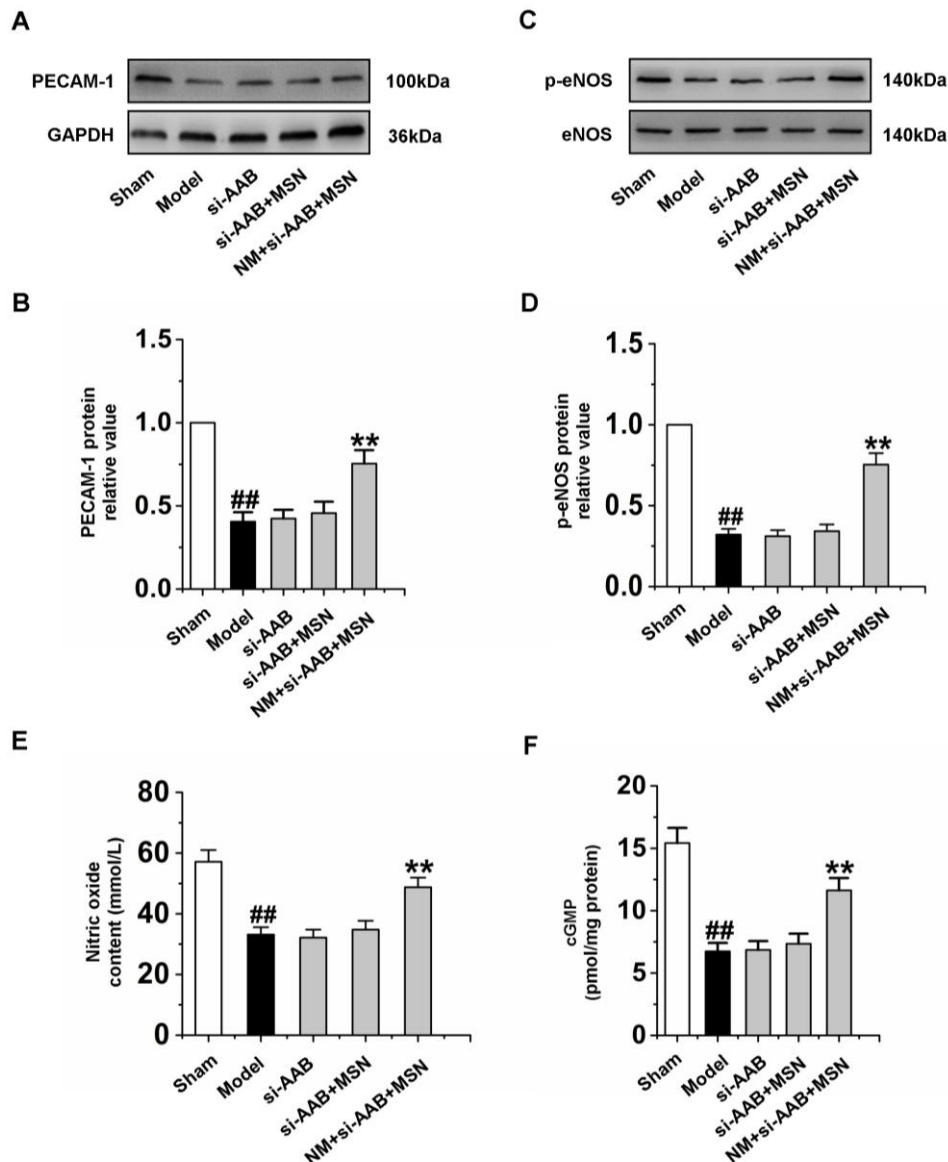

### Supplementary figure S8. NM+si-AAB+MSN plays a protective role in the cardiac microvessels

(A-B) Protein levels of *PECAM-1* in the cardiac hypertrophy rat hearts were assessed by western blot analysis. (C-D) Detection of *p-eNOS* protein expression by western blot analysis. (E) Statistical analysis chart of NO content. (F) Statistical analysis chart of cGMP content. Model group: Rats were subjected to AAC and received vehicle (PBS, caudal vein injection) 24 h later once every 2 days for 4 weeks. si-AAB group: Rats were subjected to AAC and treated with si-AAB via tail vein injection 24 h later every 2 days for 4 weeks. si-AAB+MSN group: Rats were subjected to AAC and

treated with si-AAB+MSN via tail vein injection 24 h later every 2 days for 4 weeks. NM+si-AAB+MSN group: Rats were subjected to AAC and treated with NM+si-AAB+MSN via tail vein injection 24 h later every 2 days for 4 weeks. Data were represented by means  $\pm$  SEM (n=6). <sup>##</sup> $P<0.01$  vs. sham group; <sup>\*\*</sup> $P<0.01$  vs. model group.

Supplementary figure.9

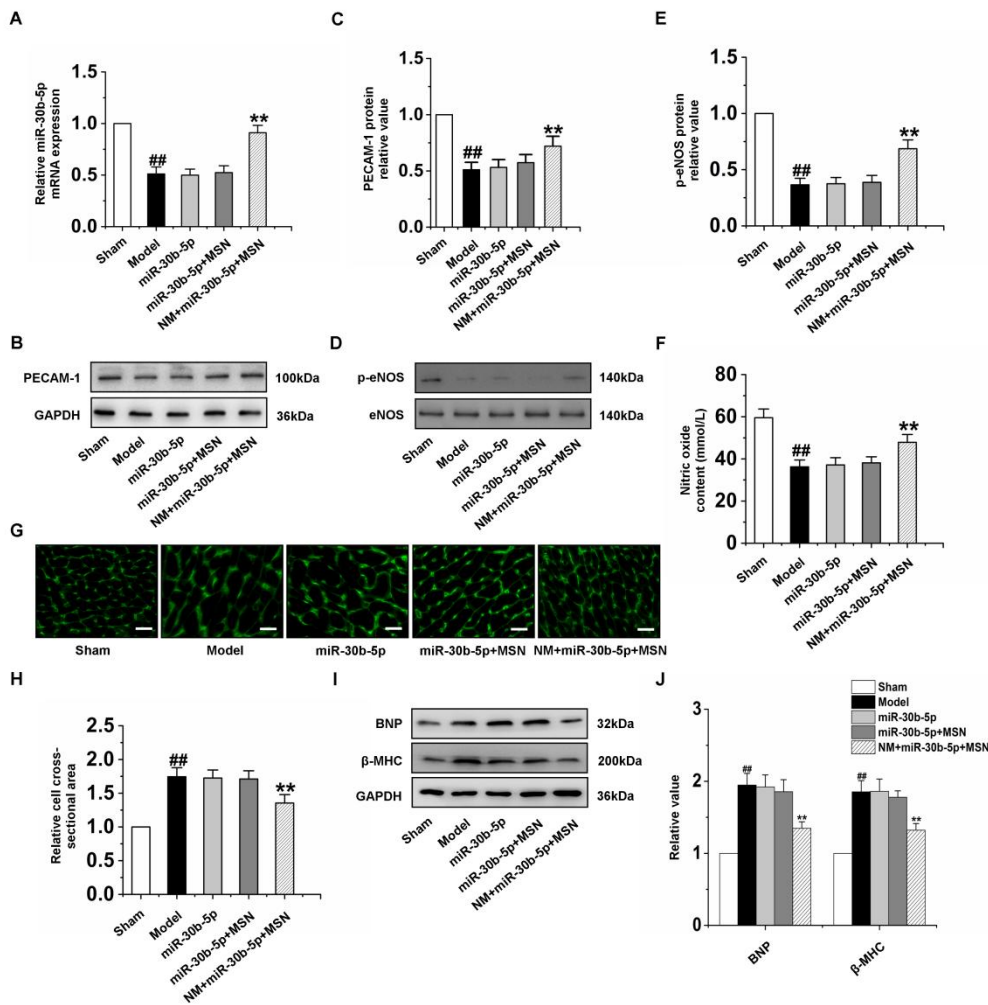

**Supplementary figure S9. NM+miR-30b-5p+MSN inhibits cardiac hypertrophy by improving cardiac microvascular function**

(A) qRT-PCR was used to detect the *miR-30b-5p* expression in cardiac tissue of rats. (B-C) Protein levels of *PECAM-1* in the cardiac hypertrophy rat hearts were assessed by western blot analysis. (D-E) Detection of *p-eNOS* protein expression by western blot analysis. (F) Statistical analysis chart of NO content. (G-H) Representative sections of hearts stained for WGA staining. (I-J) Detection of *BNP* and *β-MHC* protein expression by western blot analysis in cardiac tissue of rats. WGA: wheat germ agglutinin. Model group: Rats were subjected to AAC and received vehicle (PBS, caudal vein injection) 24 h later once every 2 days for 4 weeks. *miR-30b-5p* group: Rats were subjected to AAC and treated with *miR-30b-5p* via tail vein injection 24 h later every 2 days for 4 weeks. *miR-30b-5p*+MSN group: Rats were

subjected to AAC and treated with *miR-30b-5p*+MSN via tail vein injection 24 h later every 2 days for 4 weeks. NM+*miR-30b-5p*+MSN group: Rats were subjected to AAC and treated with NM+*miR-30b-5p*+MSN via tail vein injection 24 h later every 2 days for 4 weeks. Data were represented by means  $\pm$  SEM (n=6). <sup>##</sup> $P<0.01$  vs. sham group; <sup>\*\*</sup> $P<0.01$  vs. model group. Scale bars, 50  $\mu$ m.



Supplementary figure 10

```

TGGCGATCGGGCTGACAGGAACCCCTCAAGTTCTGAAAGATC 360
.....TCTGAAATAT 10
tctgaa at

Rat  CTTTCGATGTTTTCTTTTCITTACAGAAACCCGGGAT 400
Human cTTTCGATGTTTTCTTTTCITTACAGAAACCCGGGAT 50
c ttt cat ttttct ttttttacagaaacccgggat

GGATGTGGCCGACGCCTACGTGACTTTTCGTCCGCCACTCT 440
GGATGTGGCCGACGCCTACGTGACTTTTCGTCCGCCACTCT 90
gga gtggccgacgcctacgtgaactttcgtccgccactct

CAGGATGTCTCTCGTGATAAGGTCAATGAGGAGATGTTATA 480
CAGGATGTCTCTCGTGATAAGGTCAATGAGGAGATGTTACA 130
caggatgtctct cgtgataaggtcaatgaggagatgta a

TAGAAAAGGTTATTIGATCAATGGTACAACAGCTCCATGAA 520
TAGAAAAGGTTATTIGATCAATGGTACAACAGCTCCATGAA 170
tagaaaaggttatttgatcaatggtacaacagctccatgaa

CGTATCTGCACCTGGCTGACGACCAGGATGGACTCCAG 560
CGTATCTGCACCTGGCTGACGACCAGGATGGACTCCAG 210
cgt atctgcacctgg tga caccggatggac t cag

CTTCAGATTATCAGCTGAAAACACTAATTAGGATGGTAA 600
CTTCAGATTATCAGCTGAAAACACTAATTAGGATGGTAA 250
cttca atttatcag tgaanaactaattaggatggtaa

AGAAAACCTACAGAGATTTCCGATTGCAAGGGGCTCTGGA 640
AGAAAACCTACAGAGATTTCCGATTGCAAGGGGCTCTGGA 290
agaaaacctacagagatttccgattgcaaggggctctgga

TCCACCTTAACAGCAAGACCTATGACACCATTCGAAAT 680
TCCACCTTAACAGCAAGACCTATGACACCATTCGAAAT 330
tccaccttaaacagcaagacctatga ac at cg aa

CGCTCACIGTGAGGAAGCTACGCCCTCGTIGAGTGAAG 720
CGCTCACIGTGAGGAAGCTACGCCCTCGTIGAGTGAAG 370
cg ctcaactat gaggaaac ac gc tc atgactga a

GAGGGGGCTTGCATGGCATCAGCATGAAGGACACATGAGA 760
GAGGGGGCTTGCATGGCATCAGCATGAAGGACACATGAGA 410
g ggggg tgca ggcacagcatgaaggacag ga ga

GGAAAGTGAAGAAGACGCTAGTACTTCTCTGGTCCAA 800
GGAAAGTGAAGAAGACGCTAGTACTTCTCTGGTCCAA 446
ggaaga gaagaagacga taga catt ggtcc a

GAGTCCATGGGATGAGTCCGTGAATCATGTCATGCT 840
GAGTCCATGGGATGAGTCCGTGAATCATGTCATGCT 486
gagtc ctggga gagtccgtgaatca tgcattgc t

TAGTCTGTAGTTAACCCATTAGGAAATTTCTGTCAAC 880
TAGTCTGTAGTTAACCCATTAGGAAATTTCTGTCAAC 525
tagtctgtagttaa cccattagg aatctctgtcaac

CACCATGCCCATGAGATGTTTCAATACAGACTCCATT 920
CACCATGCCCATGAGATGTTTCAATACAGACTCCATT 565
accatgcccatgagatgttta caataga ccat

TAGCTGCTGGTACCAAGATTAGCAATG..... 950
TAGCTGCTGGTACCAAGATTAGCAATG..... 605
tagct gtggtaccaagattagca atg

.....TTTCCTGTTCTGTGTCTATATGTTTACAAGCA 984
CACTGTTTCCTGTTCTGTGTCTATATGTTTACAAGCA 645
tttctg t tc tgtctatagtttacaagca

ATAAGGAATACCATTCTTAAACTGTTCATGGACAGAA 1023
ATAAGGAGCACCATTCTTAAACTGTTCATGGACAGAA 683
atatgga accattctt aaa actgttcattggag aa

TACATAGTCTACCTCTAGCTGTGTCCTTTTGTAGCAG 1063
TACATAGTCTACCTCTAGCTGTGTCCTTTTGTAGCAA 723
tacatagt a c ctagg gtgtccct tt t agca

AACAAAAGGATGCTTCACTCTGCTCGTATGACTGA 1102
AGATCAAGGATGCTTCACTCTGCTCGTATGACTGA 763
a aa gatgcttca c tgt ct gtag a tg

TGGAGGCTCAGCTGGGCGGAGTCTCT...TCCAGT. 1138
TGGAGGCTCAGCTGGGCGGAGTCTCT...TCCAGT. 803
t g aa ga gtg g gc agt t ca

CTCTGTTTCACTATGTGGCTATCAGCTTCTTAAATAGT 1178
CTCTGTTTCACTATGTGGCTATCAGCTTCTTAAATAGT 843
ctctgtttcac tatgtgg t cag ta ttaaat agt

ACATAAATAAATTAATTAACACATAGATCTGCTTGGTT 1218
ACATAAATAAATTAATTAACACATAGATCTGCTTGGTT 883
ac taataaattaatt aa cacatagatctgtcttgg

TTGGTCTCCGTTTTGTCTCATCCCCGAAACTGAAAGCA 1258
TTT..... 887
tt

```

Supplementary figure S10. The conserved sites of lncRNA AAB between rat and human

## Supplementary figure.11

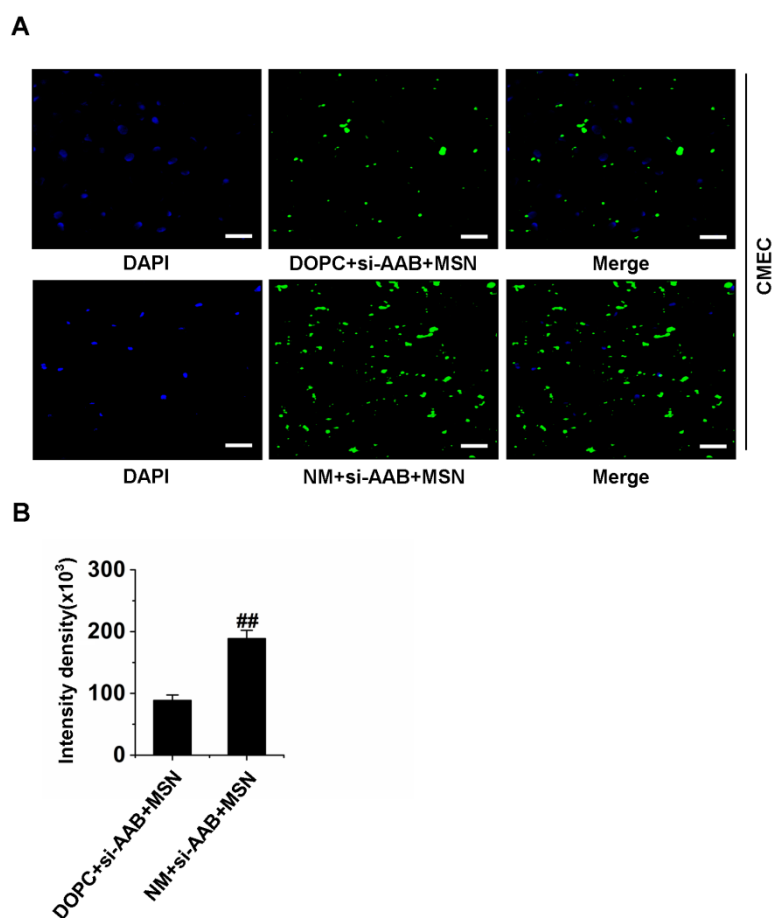

**Supplementary figure S11. The cell uptake is evaluated by immunofluorescence**  
(A-B) Cellular uptake of NM+si-AAB+MSN and DOPC+si-AAB+MSN by CMECs exposed to Ang II for 24 h, was observed by fluorescence microscopy. DOPC: dioleoylphosphatidylcholine. Data were represented by means  $\pm$  SEM (n=6). <sup>##</sup> $P < 0.01$  vs. DOPC+si-AAB+MSN group. Scale bars, 50  $\mu$ m.

**Table S1. Changes of cardiac structural and functional indicators in cardiac hypertrophy rat**

| Index         | Sham       | Model                     |
|---------------|------------|---------------------------|
| HW/BW (mg/g)  | 2.69±0.22  | 3.67±0.29 <sup>###</sup>  |
| LVW/BW (mg/g) | 2.03±0.18  | 3.19±0.21 <sup>###</sup>  |
| HW/TL (mg/mm) | 28.45±1.89 | 39.62±2.25 <sup>###</sup> |
| LVPWd (mm)    | 1.21±0.11  | 1.52±0.12 <sup>#</sup>    |
| LVIDd (mm)    | 3.82±0.29  | 5.10±0.28 <sup>#</sup>    |
| LVIDs (mm)    | 2.11±0.13  | 3.91±0.24 <sup>###</sup>  |
| LVFS (%)      | 41.2±2.31  | 24.87±1.46 <sup>###</sup> |
| LVEF (%)      | 78.15±4.52 | 57.86±3.21 <sup>###</sup> |

Data were represented by means ± SEM (n=6). <sup>#</sup>*P*<0.05 and <sup>###</sup>*P*<0.01 vs. sham group.

**Table S2. Changes of hemodynamic index in cardiac hypertrophy rat**

| Hemodynamic index               | Sham        | Model                     |
|---------------------------------|-------------|---------------------------|
| LVSP (mmHg)                     | 125.36±6.74 | 81.32±4.30 <sup>###</sup> |
| LVEDP (mmHg)                    | 5.12±0.24   | 13.27±1.04 <sup>###</sup> |
| +dp/dt <sub>max</sub> (mmHg/ms) | 4.82±0.27   | 2.81±0.21 <sup>###</sup>  |
| -dp/dt <sub>max</sub> (mmHg/ms) | -4.58±0.26  | -2.78±0.18 <sup>###</sup> |

Data were represented by means ± SEM (n=6). <sup>###</sup>*P*<0.01 vs. sham group.

**Table S3. Changes of oxidative stress indexes in cardiac hypertrophy rat**

| Oxidative stress index      | Sham          | Model                      |
|-----------------------------|---------------|----------------------------|
| SOD (U/mg protein)          | 130.55 ± 7.63 | 70.9 ± 4.44 <sup>##</sup>  |
| Mn-SOD<br>(U/mg protein)    | 19.87 ± 1.34  | 9.86 ± 0.85 <sup>##</sup>  |
| Cu/Zn-SOD<br>(U/mg protein) | 14.80 ± 1.03  | 7.62 ± 0.56 <sup>##</sup>  |
| CAT (U/mg protein)          | 42.36 ± 3.17  | 20.4 ± 2.33 <sup>##</sup>  |
| MDA (nmol/mg protein)       | 3.2 ± 0.34    | 5.99 ± 0.45 <sup>##</sup>  |
| GSH (nmol/mg protein)       | 40.35 ± 2.87  | 18.0 ± 1.92 <sup>##</sup>  |
| GSH-PX<br>(U/mg protein)    | 60.21 ± 3.57  | 35.45 ± 2.31 <sup>##</sup> |

Data were represented by means ± SEM (n=6). <sup>##</sup>P<0.01 vs. sham group.

**Table S4. Changes of oxidative stress indexes in CMECs induced by Ang II**

| Oxidative stress index      | Control       | Model                      |
|-----------------------------|---------------|----------------------------|
| SOD (U/mg protein)          | 121.36 ± 6.85 | 88.52 ± 4.22 <sup>#</sup>  |
| Mn-SOD<br>(U/mg protein)    | 18.22 ± 1.41  | 9.52 ± 0.92 <sup>##</sup>  |
| Cu/Zn-SOD<br>(U/mg protein) | 15.03 ± 1.12  | 6.99 ± 0.60 <sup>##</sup>  |
| CAT (U/mg protein)          | 38.96 ± 3.25  | 22.35 ± 2.38 <sup>##</sup> |
| MDA (nmol/mg protein)       | 3.31 ± 0.30   | 5.55 ± 0.42 <sup>##</sup>  |
| GSH (nmol/mg protein)       | 38.65 ± 2.62  | 20.30 ± 1.65 <sup>##</sup> |
| GSH-PX<br>(U/mg protein)    | 58.65 ± 3.68  | 40.35 ± 2.25 <sup>#</sup>  |

Data were represented by means ± SEM (n=6). <sup>#</sup>P<0.05 and <sup>##</sup>P<0.01 vs. control group.

**Table S5. Eleven lncRNAs shared a highly conserved binding site with miR-30b-5p in rat**

|                 |                    |     |        |      |           |    |        |        |        |
|-----------------|--------------------|-----|--------|------|-----------|----|--------|--------|--------|
| >rno-miR-30b-5p | ENSRNOT00000084731 | 164 | -14.9  | 2 17 | 28 49     | 15 | 86.67% | 86.67% | 149.1  |
| >rno-miR-30b-5p | ENSRNOT00000090427 | 167 | -18.42 | 2 21 | 947 969   | 20 | 75.00% | 85.00% | 148.58 |
| >rno-miR-30b-5p | ENSRNOT00000086616 | 162 | -14.58 | 2 21 | 960 980   | 19 | 78.95% | 78.95% | 147.42 |
| >rno-miR-30b-5p | ENSRNOT00000077548 | 168 | -21.46 | 2 21 | 52 71     | 19 | 84.21% | 89.47% | 146.54 |
| >rno-miR-30b-5p | ENSRNOT00000081630 | 162 | -16.5  | 2 19 | 102 123   | 17 | 76.47% | 82.35% | 145.5  |
| >rno-miR-30b-5p | ENSRNOT00000079518 | 162 | -17.11 | 2 16 | 281 303   | 15 | 86.67% | 93.33% | 144.89 |
| >rno-miR-30b-5p | ENSRNOT00000075897 | 164 | -19.33 | 2 20 | 3269 3288 | 18 | 83.33% | 83.33% | 144.67 |
| >rno-miR-30b-5p | ENSRNOT00000084787 | 163 | -19.08 | 2 20 | 196 217   | 18 | 77.78% | 77.78% | 143.92 |
| >rno-miR-30b-5p | ENSRNOT00000080464 | 162 | -18.56 | 2 20 | 730 752   | 19 | 73.68% | 84.21% | 143.44 |
| >rno-miR-30b-5p | ENSRNOT00000043280 | 165 | -22.17 | 2 19 | 714 736   | 18 | 83.33% | 83.33% | 142.83 |
| >rno-miR-30b-5p | ENSRNOT00000087948 | 160 | -18.78 | 2 21 | 923 941   | 19 | 78.95% | 78.95% | 141.22 |

**Table S6. Changes of cardiac structural and functional indicators in cardiac hypertrophy rat**

| Indicator     | Sham       | Model                    | si-AAB     | si-AAB+MSN | NM+si-AAB+MSN            |
|---------------|------------|--------------------------|------------|------------|--------------------------|
| HW/BW (mg/g)  | 2.64±0.25  | 3.88±0.28 <sup>###</sup> | 3.73±0.27  | 3.71±0.25  | 3.06±0.19 <sup>**</sup>  |
| LVW/BW (mg/g) | 2.21±0.19  | 3.22±0.23 <sup>###</sup> | 3.26±0.26  | 3.08±0.18  | 2.68±0.21 <sup>**</sup>  |
| HW/TL (mg/mm) | 28.34±1.91 | 40.03±2.33 <sup>##</sup> | 39.83±2.08 | 38.88±2.12 | 32.18±2.35 <sup>**</sup> |
| LVPWd (mm)    | 1.22±0.13  | 1.71±0.14 <sup>#</sup>   | 1.66±0.12  | 1.65±0.14  | 1.34±0.12 <sup>**</sup>  |
| LVIDd (mm)    | 3.90±0.25  | 5.48±0.23 <sup>###</sup> | 5.19±0.20  | 5.10±0.22  | 4.21±0.25 <sup>**</sup>  |
| LVIDs (mm)    | 2.08±0.12  | 4.05±0.22 <sup>###</sup> | 3.91±0.23  | 3.82±0.23  | 2.65±0.20 <sup>**</sup>  |

Data were represented by means ± SEM (n=6). <sup>#</sup>*P*<0.05 and <sup>##</sup>*P*<0.01 vs. sham group; <sup>\*\*</sup>*P*<0.01 vs. model group.

**Table S7. Primer sequences**

| Name                                            | Forward (5'-3')          | Reverse (5'-3')         |
|-------------------------------------------------|--------------------------|-------------------------|
| <i>ptgs2</i>                                    | CAACCAGCAGTTCCAGTATCAG   | GAGCAAGTCCGTGTTCAAGG    |
| <i>Ang-2</i>                                    | AGCCAGTCTCCCTTCCAG       | AGGCAAGCCATTCTCACA      |
| <i>PDGFR-β</i>                                  | GCACCGAAACAAACACACCTT    | ATGTAACCACCGTTCGCTCTC   |
| <i>miR-30b-5p</i>                               | CCAGCAACTGTAAACATCCTACAC | TATGGTTTTGACGACTGTGTGAT |
| lncRNA <i>AAB</i>                               | TTCGTCCGCCACTCTCAGGATG   | TCGGTCAGCCAGGTGCAGATG   |
| <i>TIMP1</i> siRNA                              | GGAACGGAAAUUUGCACAUTT    | AUGUGCAAUUUCCGUUCCTT    |
| negative control of<br><i>TIMP1</i> siRNA       | UUCUCCGAACGUGUCACGUTT    | ACGUGACACGUUCGGAGAATT   |
| <i>miR-30b-5p</i> mimics                        | UGUAAACAUCCUACACUCAGCU   | CUGAGUGUAGGAUGUUUACAUU  |
| negative control of<br><i>miR-30b-5p</i> mimics | UUGAGCCACAGCUGCAUACTT    | ACCCGGAAGGCCGCAAGCTT    |
| lncRNA <i>AAB</i><br>siRNA                      | GUCCUGGAUCCACCUUAATT     | UUAAGGUGGAAUCCAGGACTT   |
